# Supplementary material
Source: Research Square preprint supplement (doi:10.21203/rs.3.rs-9024829/v1)
Supplement: Supplementary file 1 [file 4c01c5be2ae388513d9ba0cb.docx]

**Supplementary Methods S1.** CKD-EPI equations and derived renal biomarkers.

Supplementary Methods S1. CKD-EPI equations and derived renal biomarkers.

Participant-level estimated glomerular filtration rate (eGFR) was calculated from serum creatinine (SCr, mg/dL) and age using the CKD-EPI 2021 creatinine equation (race-free). For females, constants were κ = 0.7 and α = −0.241, and eGFR was computed as:
eGFR (mL·min⁻¹·1.73 m⁻²) = 142 × min(SCr/κ, 1)^α × max(SCr/κ, 1)^−1.200 × (0.9938)^Age × 1.012

Serum cystatin C (Scys, mg/L) was used to compute cystatin C-based eGFR (eGFRcys) using the CKD-EPI 2012 cystatin C equation (sex-specific multiplier applied):
eGFRcys (mL·min⁻¹·1.73 m⁻²) = 133 × min(Scys/0.8, 1)^−0.499 × max(Scys/0.8, 1)^−1.328 × (0.996)^Age × 0.932

A combined creatinine–cystatin C estimate (eGFRcr-cys) was calculated using the CKD-EPI 2021 creatinine–cystatin C equation (race-free):
eGFRcr-cys (mL·min⁻¹·1.73 m⁻²) = 135 × min(SCr/0.7, 1)^−0.219 × max(SCr/0.7, 1)^−0.544 × min(Scys/0.8, 1)^−0.323 × max(Scys/0.8, 1)^−0.778 × (0.9961)^Age × 0.963

Absolute and relative changes for each estimate were computed as Δ = post − pre and %Δ = 100 × (post − pre)/pre.

Because urea was provided in mg/dL, blood urea nitrogen (BUN, mg/dL) was additionally estimated using:
BUN = Urea × 0.466

The BUN-to-creatinine ratio was calculated at each time point as:
BUN/Cr = BUN (mg/dL) / SCr (mg/dL)
and its change was computed as:
Δ(BUN/Cr) = (BUN/Cr)post − (BUN/Cr)pre
